# Supplementary material for: Fe3+‐Exchanged Titanate Nanotubes: A New Kind of Highly Active Heterogeneous Catalyst for Friedel‐Crafts Type Benzylation
Source: Hindawi journal article supplement (doi:10.1155/2015/738089), 2015-01-01
Supplement: f1 [file 738089.f1.docx]

**Fe3+-exchanged titanate nanotubes: A new kind of highly active heterogeneous catalyst for Friedel–Crafts type benzylation**

Yunchen Du,a,b,* Di Guo,b Meiling Xiong,b Yanwu Qi,b Chenkui Cui,b Jun Ma,a Xijiang Han,b Ping Xub,*

aState Key Laboratory of Urban Water Resource and Environment, School of Municipal and Environmental Engineering, Harbin Institute of Technology, Harbin 150090, PR China

bDepartment of Chemistry, Harbin Institute of Technology, Harbin 150001, China


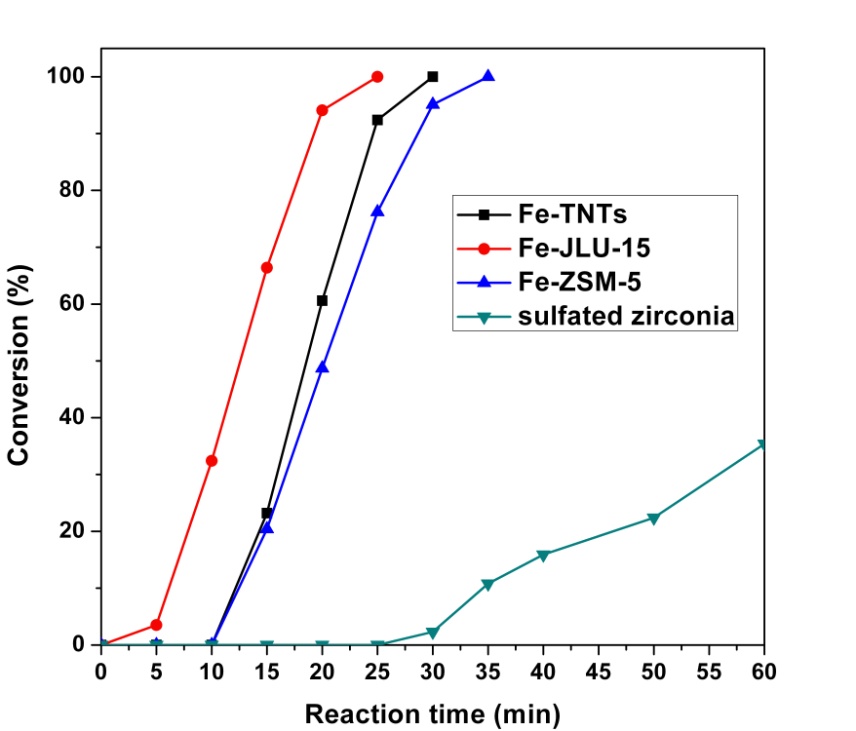


Figure S1 Dependence of benzyl chloride conversion on reaction time over various heterogeneous catalysts at 70 °C.


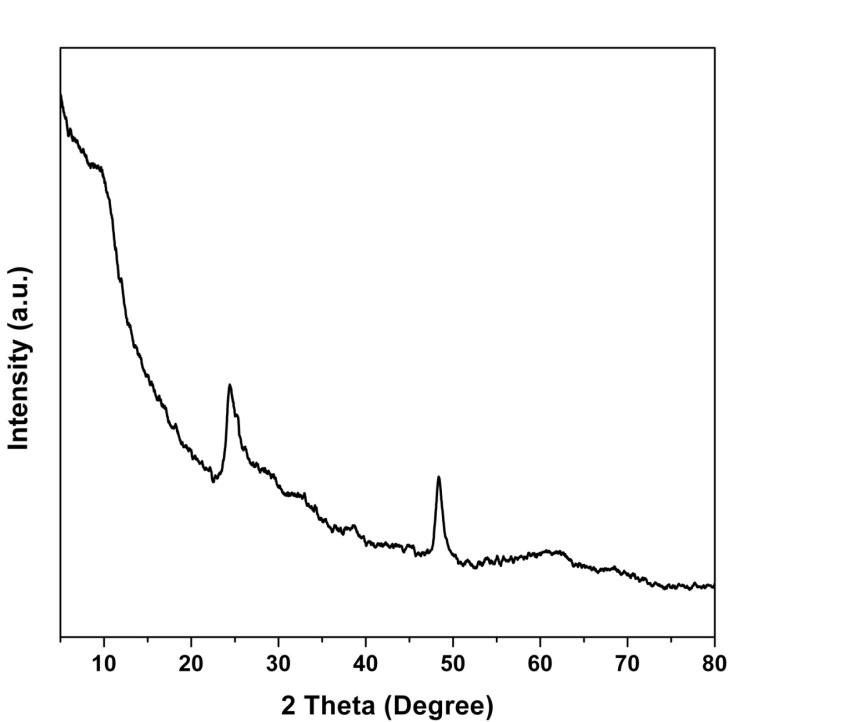


Figure S2 XRD pattern of used Fe-TNTs.


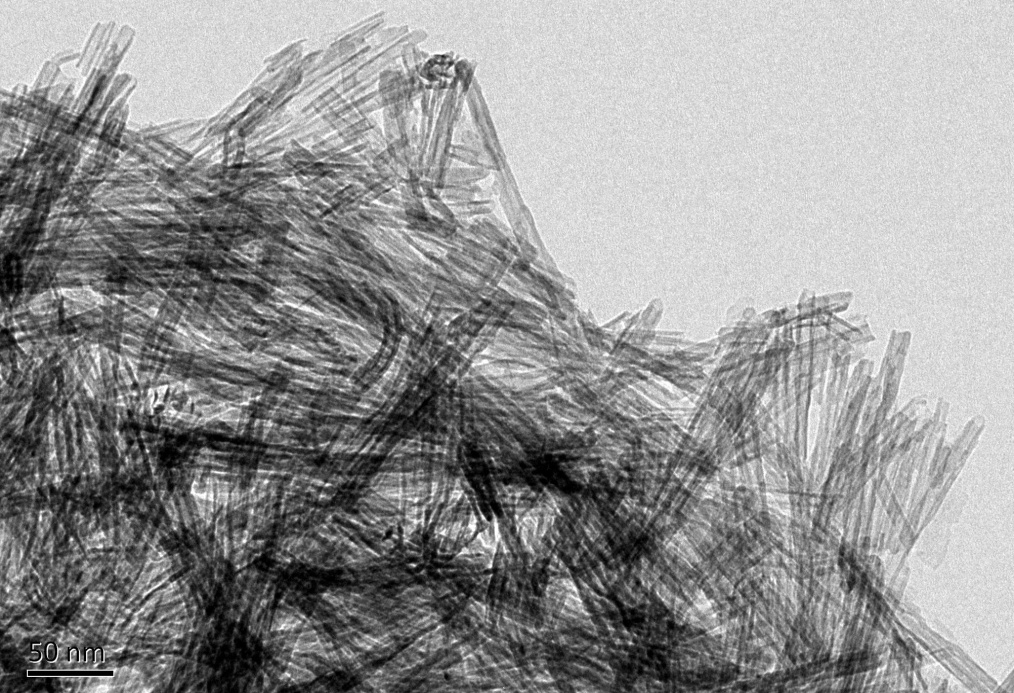


Figure S3 TEM image of used Fe-TNTs.


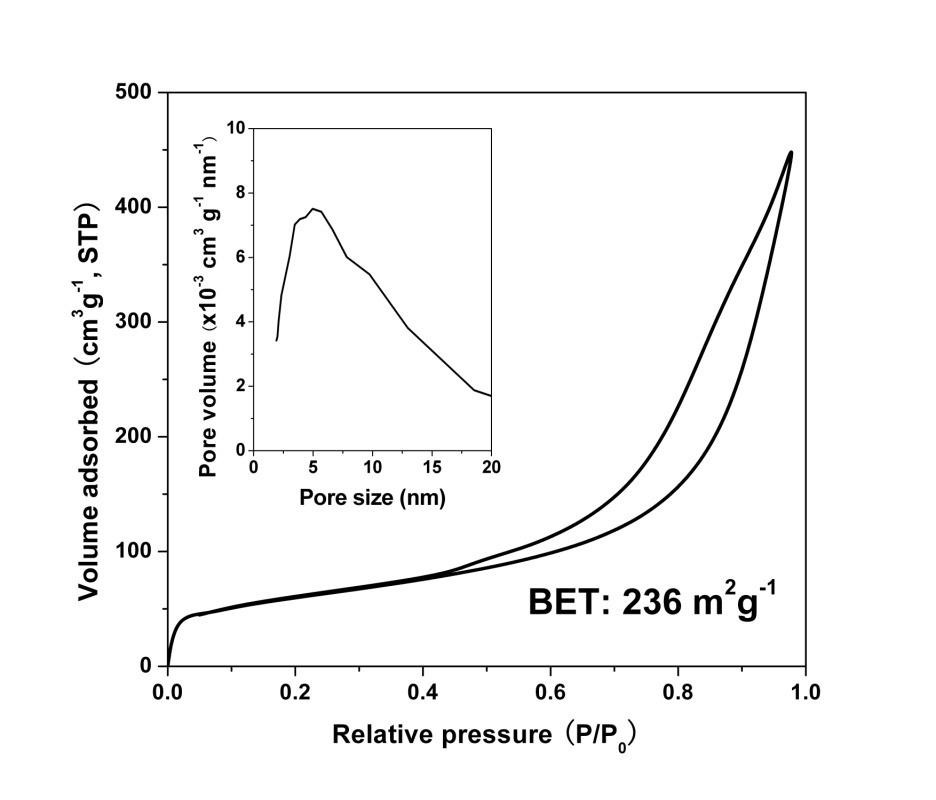


Figure S4 N2 adsorption/desorption isotherms and pore size distribution (inset) of used Fe-TNTs.


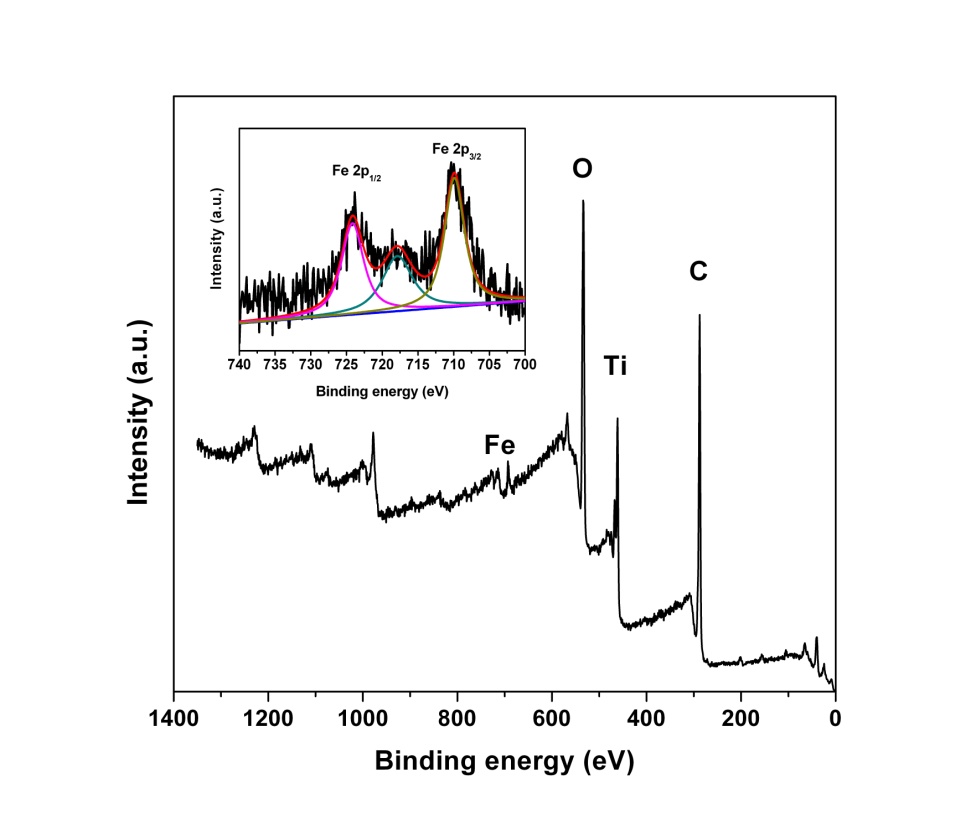


Figure S5 Survey and Fe 2p (inset) XPS spectra of used Fe-TNTs.


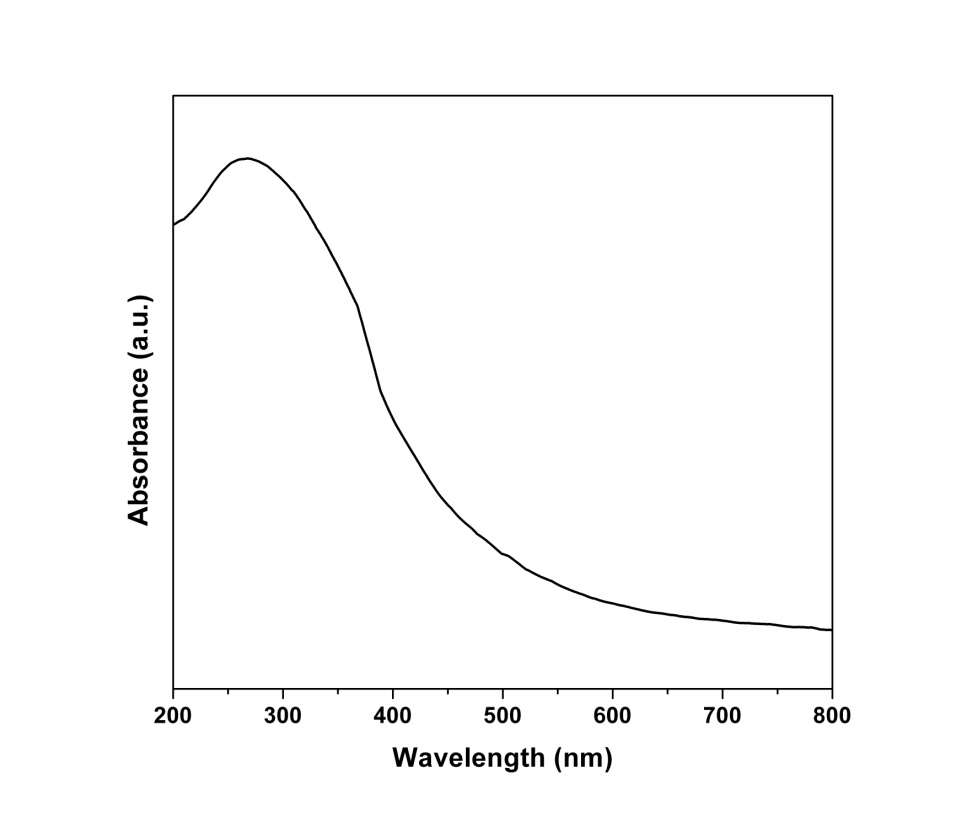


Figure S6 UV-Vis spectra of used Fe-TNTs.
